# Supplementary material for: Serologic Investigation on Tick-Borne Encephalitis Virus, Kemerovo Virus and Tribeč Virus Infections in Wild Birds
Source: MDPI journal article supplement (doi:10.3390/microorganisms10122397), 2022-12-02
Supplement: s1 [file s1]

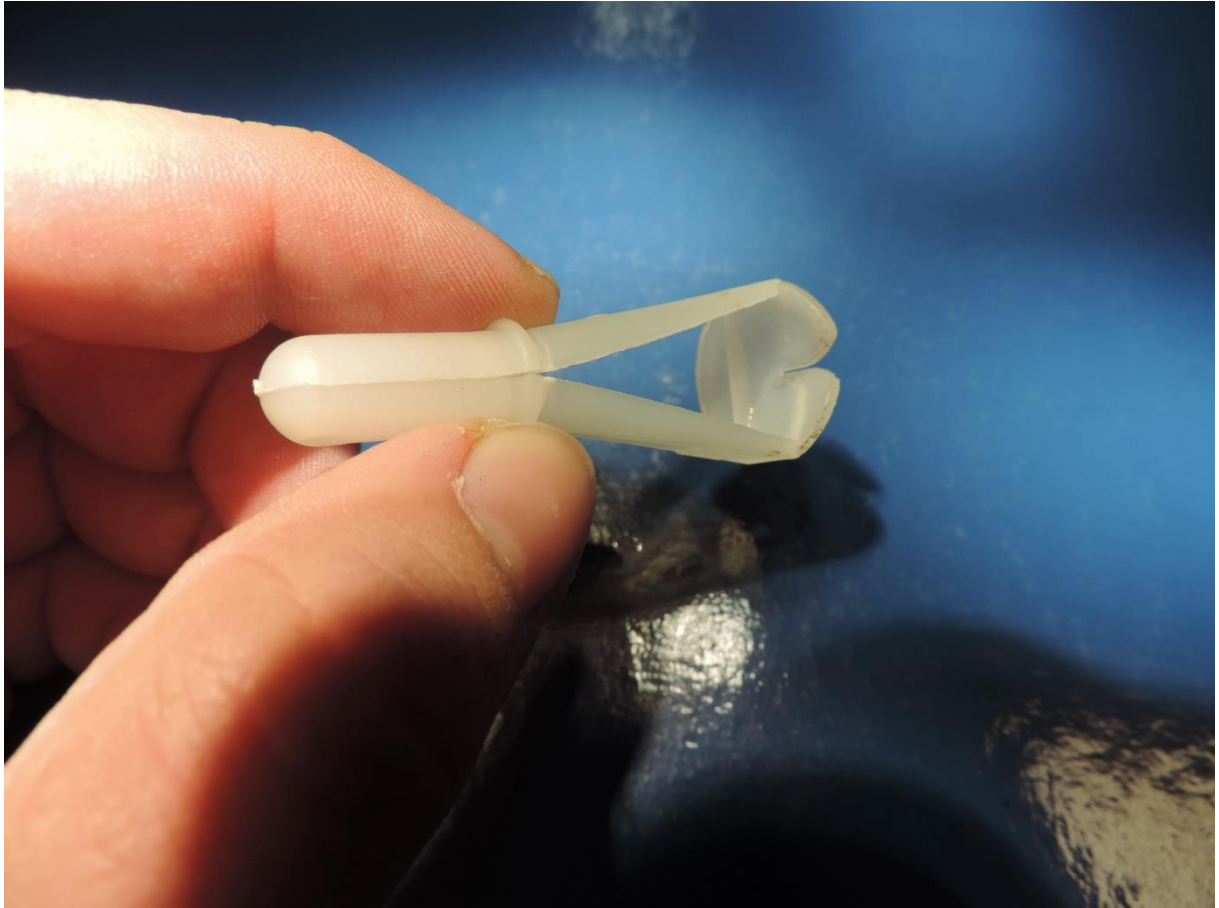

**Figure S1** Tick removal spoon (Dr. Kapiller®, Budapest, Hungary)

**Table S1.** Thermal profiles of PCR used for the GIV serogroup orbivirus RNA and *Flavivirus* RNA detection

| GIV serogroup orbivirus PCR   |     |               |
|-------------------------------|-----|---------------|
| Initial denaturation          | 1×  | 95 °C, 1 min  |
| Denaturation                  | 40× | 95 °C, 45 sec |
| Annealing                     |     | 55 °C, 30 sec |
| Extension                     |     | 72 °C, 45 sec |
| Final extension               | 1×  | 72 °C, 10 min |
| <i>Flavivirus</i> generic PCR |     |               |
| 1 <sup>st</sup> PCR           |     |               |
| Initial denaturation          | 1×  | 95 °C, 1 min  |
| Denaturation                  | 35× | 95 °C, 30 sec |
| Annealing                     |     | 50 °C, 45 sec |
| Extension                     |     | 72 °C, 45 sec |
| Final extension               | 1×  | 72 °C, 5 min  |
| 2 <sup>nd</sup> PCR           |     |               |
| Initial denaturation          | 1×  | 95 °C, 1 min  |
| Denaturation                  | 40× | 95 °C, 30 sec |
| Annealing                     |     | 50 °C, 45 sec |
| Extension                     |     | 72 °C, 45 sec |
| Final extension               | 1×  | 72 °C, 5 min  |

**Table S2.** The list of captured bird species and proportion of seropositive tick-infested and non-infested individuals in the screening and their migratory status

| Bird species                                             | No. of caught birds/<br>No. of tick-infested<br>individuals | Migratory<br>status | No. of seropositive / no. of tested |      |      |                     |      |      | No. of co-infection (cross-<br>reaction) per individual |       |                                 |
|----------------------------------------------------------|-------------------------------------------------------------|---------------------|-------------------------------------|------|------|---------------------|------|------|---------------------------------------------------------|-------|---------------------------------|
|                                                          |                                                             |                     | Non-infested birds                  |      |      | Tick-infested birds |      |      | TBEV+                                                   | TBEV+ | TRBV+                           |
|                                                          |                                                             |                     | TBEV                                | TRBV | KEMV | TBEV                | TRBV | KEMV | TRBV                                                    | KEMV  | KEMV                            |
| <i>Acrocephalus arundinaceus</i> /<br>Great reed warbler | 2/0                                                         | L                   | 0/2                                 | 0/1  | 0/2  | -                   | -    | -    | -                                                       | -     | -                               |
| <i>Acrocephalus palustris</i> /<br>Marsh warbler         | 10/0                                                        | L                   | 0/10                                | 2/6  | 1/7  | -                   | -    | -    | -                                                       | -     | -                               |
| <i>Acrocephalus scirpaceus</i> /<br>Reed warbler         | 1/0                                                         | L                   | 0/1                                 | 0/1  | 0/1  | -                   | -    | -    | -                                                       | -     | -                               |
| <i>Alcedo atthis</i> /<br>Common kingfisher              | 1/0                                                         | S                   | 0/1                                 | 0/1  | NT   | -                   | -    | -    | -                                                       | -     | -                               |
| <i>Buteo buteo</i> /<br>Common buzzard                   | 1/0                                                         | S                   | 0/1                                 | NT   | 0/1  | -                   | -    | -    | -                                                       | -     | -                               |
| <i>Carduelis carduelis</i> /<br>European goldfinch       | 2/0                                                         | S                   | 0/2                                 | 0/1  | 0/1  | -                   | -    | -    | -                                                       | -     | -                               |
| <i>Coccothraustes coccothraustes</i> /<br>Hawfinch       | 14/3                                                        | S                   | 0/11                                | 2/8  | 0/10 | 0/3                 | 3/3  | 1/3  | -                                                       | -     | 0 <sup>ni</sup> /1 <sup>i</sup> |
| <i>Cyanistes caeruleus</i> /<br>Eurasian blue tit        | 7/0                                                         | S                   | 0/7                                 | 0/2  | 0/4  | -                   | -    | -    | -                                                       | -     | -                               |
| <i>Emberiza citrinella</i> /<br>Yellowhammer             | 4/0                                                         | S                   | 0/4                                 | 0/3  | 0/3  | -                   | -    | -    | -                                                       | -     | -                               |
| <i>Emberiza schoeniclus</i> /<br>Common reed bunting     | 1/0                                                         | S                   | 0/1                                 | NT   | 0/1  | -                   | -    | -    | -                                                       | -     | -                               |
| <i>Erithacus rubecula</i> /<br>European robin            | 93/23                                                       | S                   | 5/69                                | 6/36 | 2/57 | 1/22                | 4/22 | 1/22 | 1 <sup>ni</sup> /1 <sup>i</sup>                         | -     | 2 <sup>ni</sup> /1 <sup>i</sup> |
| <i>Ficedula albicollis</i> /<br>Collared flycatcher      | 1/0                                                         | L                   | 0/1                                 | NT   | 0/1  | -                   | -    | -    | -                                                       | -     | -                               |
| <i>Fringilla coelebs</i> /<br>Common chaffinch           | 11/3                                                        | S                   | 0/8                                 | 1/3  | 2/6  | 0/3                 | 1/3  | 0/3  | -                                                       | -     | 1 <sup>ni</sup> /0 <sup>i</sup> |
| <i>Fringilla montifringilla</i> /<br>Brambling           | 1/0                                                         | S                   | 0/1                                 | NT   | 0/1  | -                   | -    | -    | -                                                       | -     | -                               |

**Table S2. Continued**

| Bird species                                         | No. of caught birds/<br>No. of tick-infested<br>individuals | Migratory<br>status | No. of seropositive / no. of tested |      |      |                     |      |      | No. of co-infection (cross-<br>reaction) per individual |                                 |                                 |
|------------------------------------------------------|-------------------------------------------------------------|---------------------|-------------------------------------|------|------|---------------------|------|------|---------------------------------------------------------|---------------------------------|---------------------------------|
|                                                      |                                                             |                     | Non-infested birds                  |      |      | Tick-infested birds |      |      | TBEV+<br>TRBV                                           | TBEV+<br>KEMV                   | TRBV+<br>KEMV                   |
|                                                      |                                                             |                     | TBEV                                | TRBV | KEMV | TBEV                | TRBV | KEMV |                                                         |                                 |                                 |
| <i>Garrulus glandarius</i> /<br>Eurasian jay         | 3/0                                                         | S                   | 0/3                                 | 1/3  | 2/3  | -                   | -    | -    | -                                                       | -                               | 1 <sup>ni</sup> /0 <sup>i</sup> |
| <i>Chloris chloris</i> /<br>European greenfinch      | 1/0                                                         | S                   | 0/1                                 | NT   | 0/1  | -                   | -    | -    | -                                                       | -                               | -                               |
| <i>Lanius collurio</i> /<br>Red-backed shrike        | 2/0                                                         | L                   | 0/2                                 | 0/2  | 0/2  | -                   | -    | -    | -                                                       | -                               | -                               |
| <i>Luscinia megarhynchos</i> /<br>Common nightingale | 10/2                                                        | L                   | 1/8                                 | 0/5  | 0/8  | 0/2                 | 0/2  | 0/2  | -                                                       | -                               | -                               |
| <i>Parus major</i> /<br>Great tit                    | 72/18                                                       | S                   | 0/54                                | 8/36 | 2/47 | 0/14                | 1/14 | 1/14 | -                                                       | -                               | 2 <sup>ni</sup> /0 <sup>i</sup> |
| <i>Passer montanus</i> /<br>Eurasian tree sparrow    | 1/0                                                         | S                   | 0/1                                 | 0/1  | NT   | -                   | -    | -    | -                                                       | -                               | -                               |
| <i>Phoenicurus ochruros</i> /<br>Black redstart      | 1/0                                                         | S                   | 0/1                                 | 0/1  | 0/1  | -                   | -    | -    | -                                                       | -                               | -                               |
| <i>Phylloscopus collybita</i> /<br>Common chiffchaff | 1/0                                                         | S/L                 | 0/1                                 | 0/1  | 0/1  | -                   | -    | -    | -                                                       | -                               | -                               |
| <i>Poecile palustris</i> /<br>Marsh tit              | 5/0                                                         | N                   | 0/5                                 | NT   | 0/3  | -                   | -    | -    | -                                                       | -                               | -                               |
| <i>Prunella modularis</i> /<br>Dunnock               | 5/2                                                         | S                   | 0/3                                 | 0/2  | 0/3  | 0/1                 | 1/1  | 0/1  | -                                                       | -                               | -                               |
| <i>Pyrrhula pyrrhula</i> /<br>Eurasian bullfinch     | 1/0                                                         | S                   | 0/1                                 | 0/1  | NT   | -                   | -    | -    | -                                                       | -                               | -                               |
| <i>Sitta europaea</i> /<br>Wood nuthatch             | 2/0                                                         | N                   | 0/2                                 | 0/2  | 0/2  | -                   | -    | -    | -                                                       | -                               | -                               |
| <i>Sylvia atricapilla</i> /<br>Eurasian blackcap     | 93/3                                                        | S/L                 | 24/90                               | 4/58 | 7/69 | 0/3                 | 0/3  | 0/3  | 1 <sup>ni</sup> /0 <sup>i</sup>                         | 1 <sup>ni</sup> /0 <sup>i</sup> | -                               |
| <i>Sylvia borin</i> /<br>Garden warbler              | 1/0                                                         | L                   | 0/1                                 | NT   | NT   | -                   | -    | -    | -                                                       | -                               | -                               |
| <i>Sylvia curruca</i> /<br>Lesser whitethroat        | 1/0                                                         | L                   | 0/1                                 | NT   | NT   | -                   | -    | -    | -                                                       | -                               | -                               |
| <i>Turdus iliacus</i> /<br>Redwing                   | 1/0                                                         | S                   | 0/1                                 | 1/1  | 0/1  | -                   | -    | -    | -                                                       | -                               | -                               |

**Table S2. Continued**

| Bird species                               | No. of caught birds/<br>No. of tick-infested<br>individuals | Migratory<br>status | No. of seropositive / no. of tested |      |      |                     |       |      | No. of co-infection (cross-<br>reaction) per individual |       |                                 |
|--------------------------------------------|-------------------------------------------------------------|---------------------|-------------------------------------|------|------|---------------------|-------|------|---------------------------------------------------------|-------|---------------------------------|
|                                            |                                                             |                     | Non-infested birds                  |      |      | Tick-infested birds |       |      | TBEV+                                                   | TBEV+ | TRBV+                           |
|                                            |                                                             |                     | TBEV                                | TRBV | KEMV | TBEV                | TRBV  | KEMV | TRBV                                                    | KEMV  | KEMV                            |
| <i>Turdus merula</i> /<br>Common blackbird | 31/27                                                       | S                   | 2/4                                 | 1/4  | 0/4  | 4/21                | 10/21 | 5/21 | 0 <sup>ni</sup> /1 <sup>i</sup>                         | -     | 0 <sup>ni</sup> /4 <sup>i</sup> |
| <i>Turdus philomelos</i> /<br>Song thrush  | 13/7                                                        | S                   | 0/4                                 | 0/3  | 0/4  | 0/5                 | 4/5   | 0/5  | -                                                       | -     | -                               |

*Legend: no. – number; - – negative; NT – not tested, <sup>ni</sup> – non-infested birds; <sup>i</sup> – infested birds; L – species strictly long-distance migrant, S – species strictly short-distance migrant, S/L – species in which some individuals are short-distance migrants whereas others are long-distance migrants, N – non-migratory species*
